# Supplementary material
Source: publisher site journal article supplement (https://www.spandidos-publications.com/4152/downloadSupplementary)

Figure S1. PLD2 expression in skin melanocytes and melanoma cell lines. Full-length western blot images for PLD2 (106 kDa) expression in skin melanocytes and primary melanomas (top) and metastatic melanomas (bottom). To the right of each PLD2 western blot, the matching tubulin bands are provided as a control. PLD, phospholipase D.

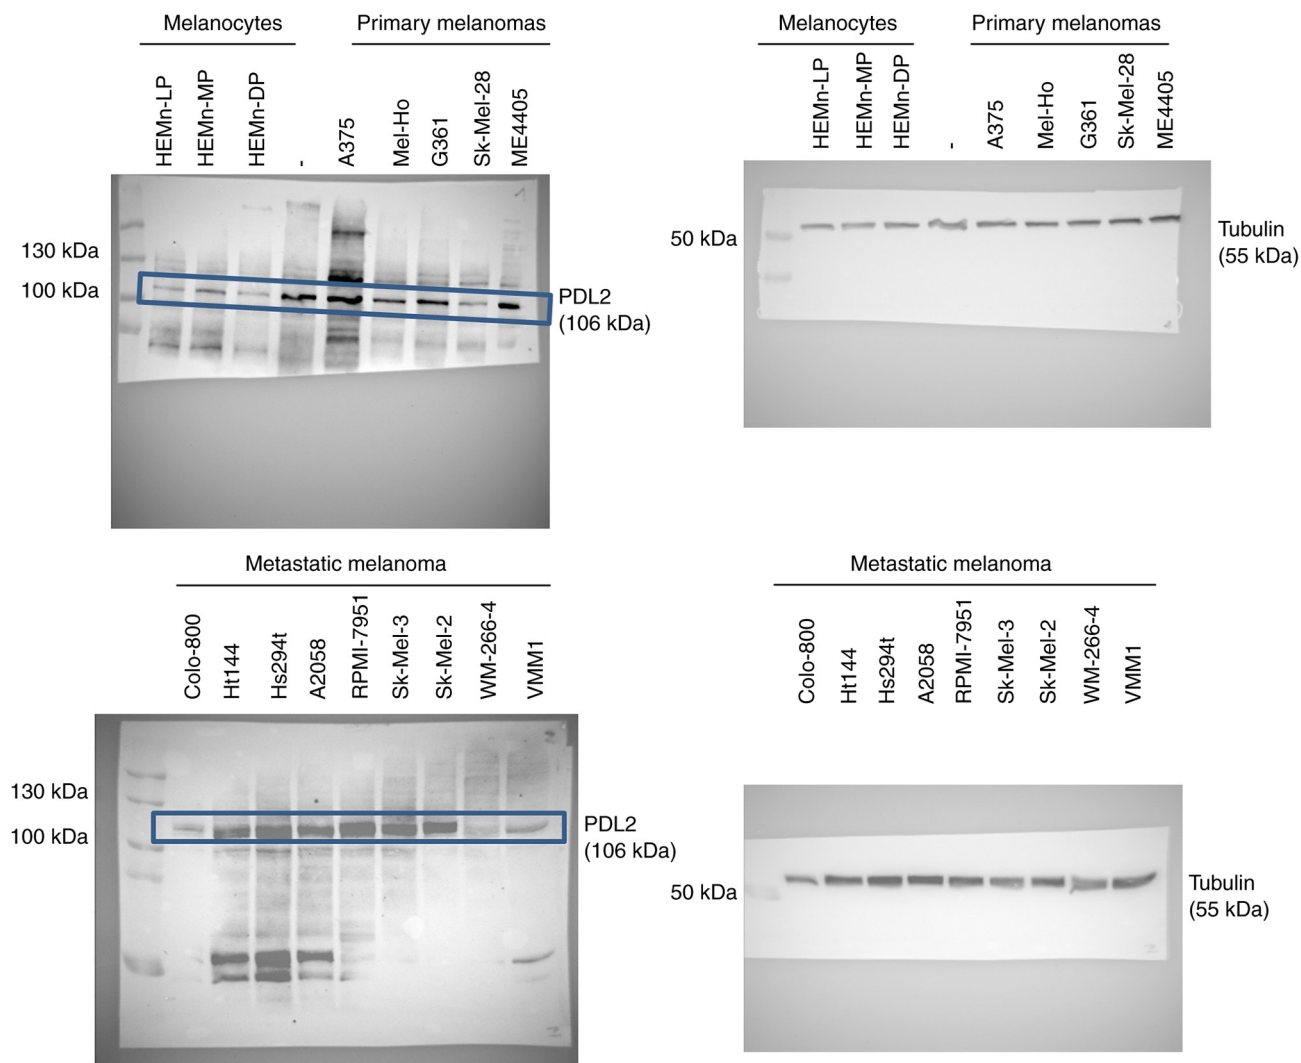

Figure S2. PLD1 expression in skin melanocytes and melanoma cell lines. Full-length western blot images for PLD1 (112 kDa) expression in skin melanocytes and primary melanomas (top) and metastatic melanomas (bottom). To the right of each PLD1 western blot, the matching tubulin bands are provided as a control. PLD, phospholipase D.

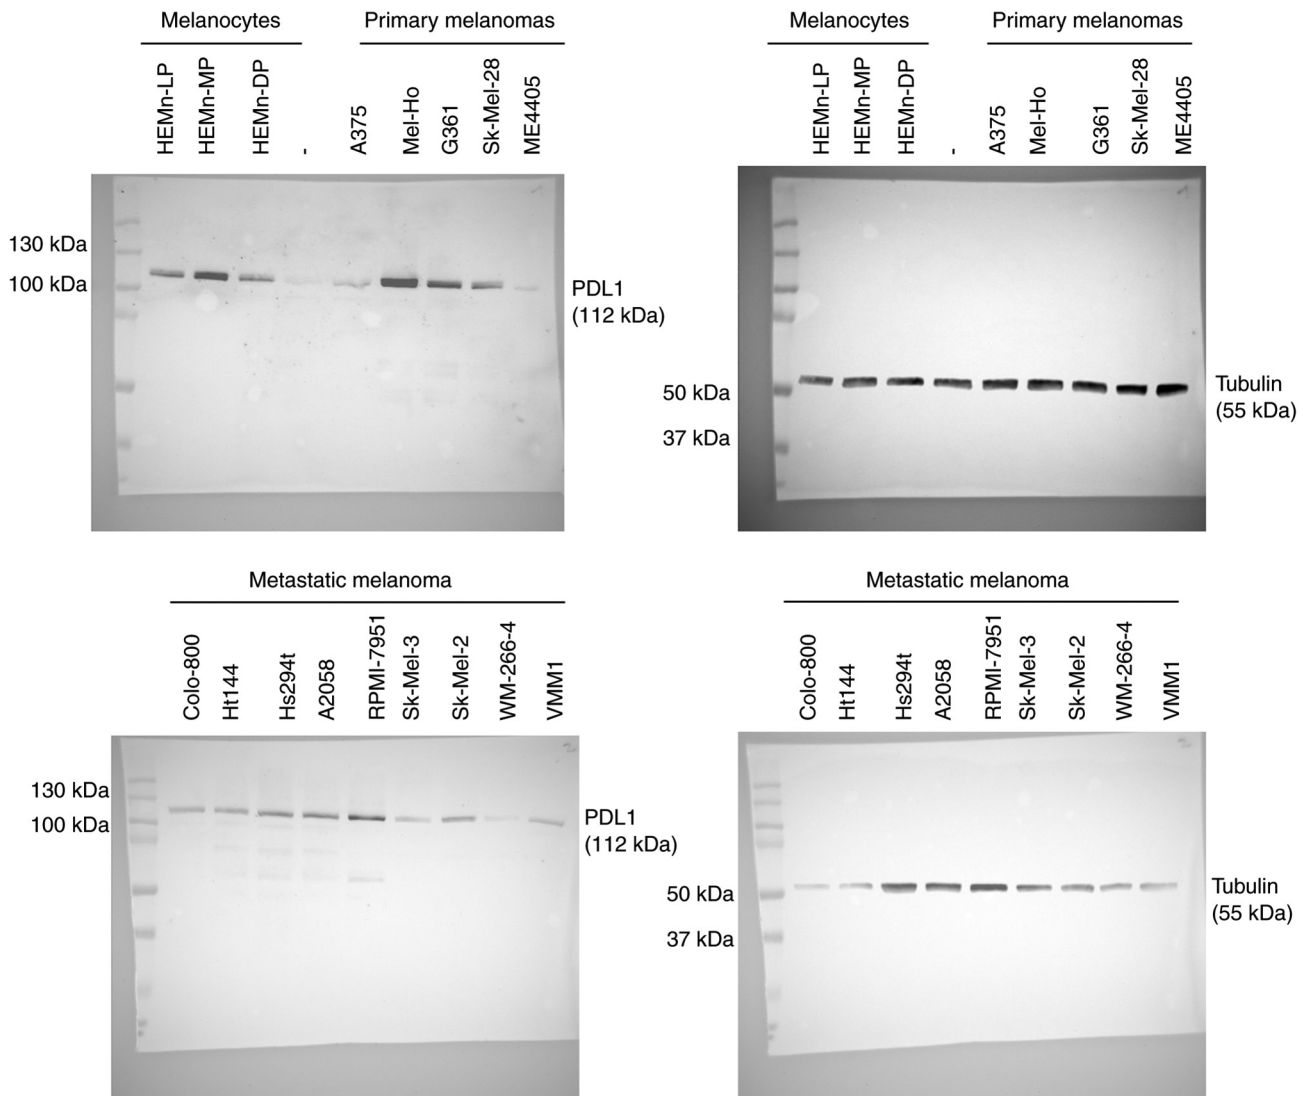

Figure S3. PLA<sub>2</sub> and PLC expression in skin melanocytes and melanoma cell lines. Full-length western blot images for PLA<sub>2</sub> and PLC expression, using  $\alpha$ -tubulin as a loading control. The images correspond to the same membrane cut into three parts. Each was used to reveal a specific protein according to its molecular weight. The figure is representative of four independent experiments. PLA, phospholipase A.

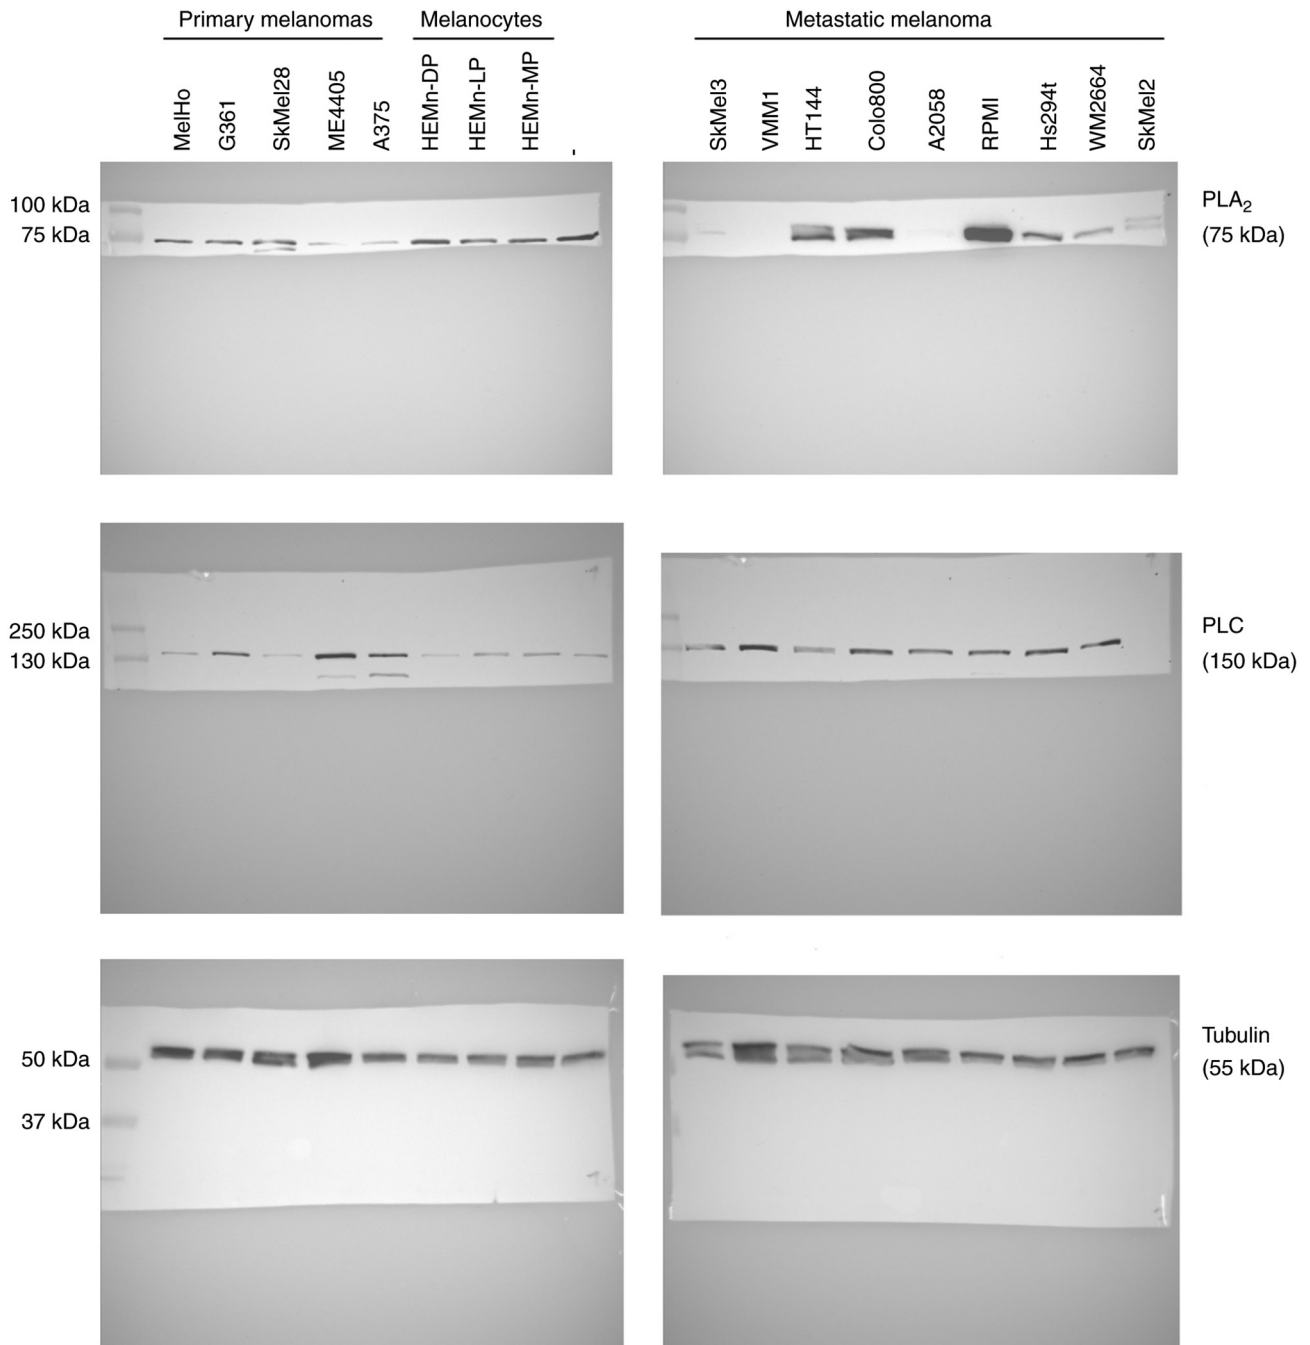

Figure S4. PLD2 expression in PLD2 overexpressed and silenced melanoma cell lines. Full-length western blot images for PLD2 (106 kDa) expression in A375 primary melanoma (top and bottom), Mel-Ho primary melanoma and Colo-800 metastatic melanoma (middle and bottom). PLD, phospholipase D; OE, PLD2 overexpression; si, PLD2 knockdown.

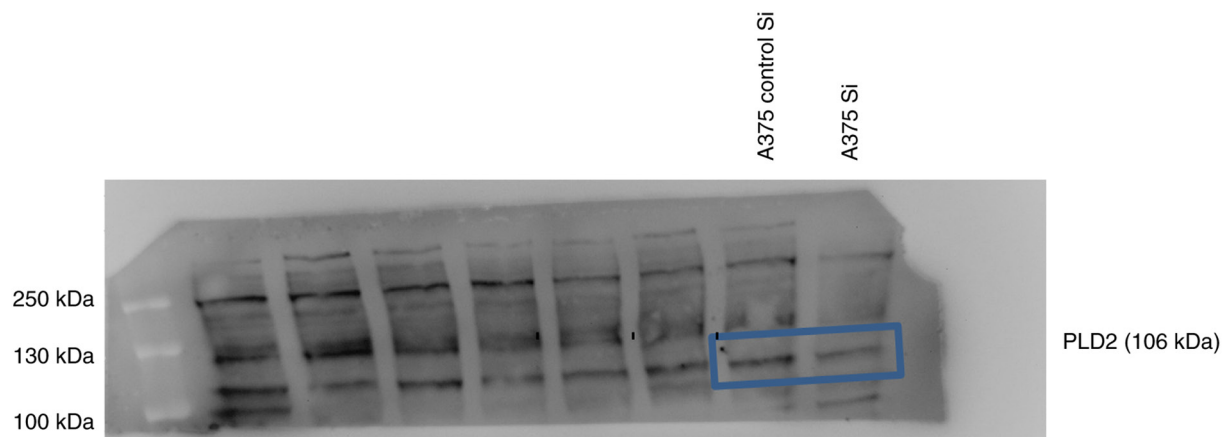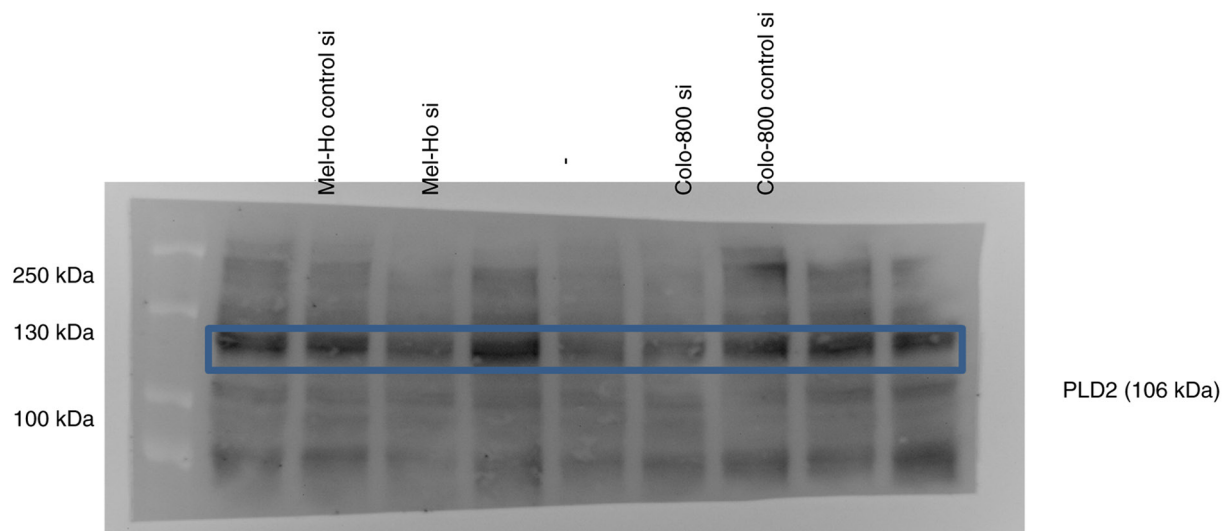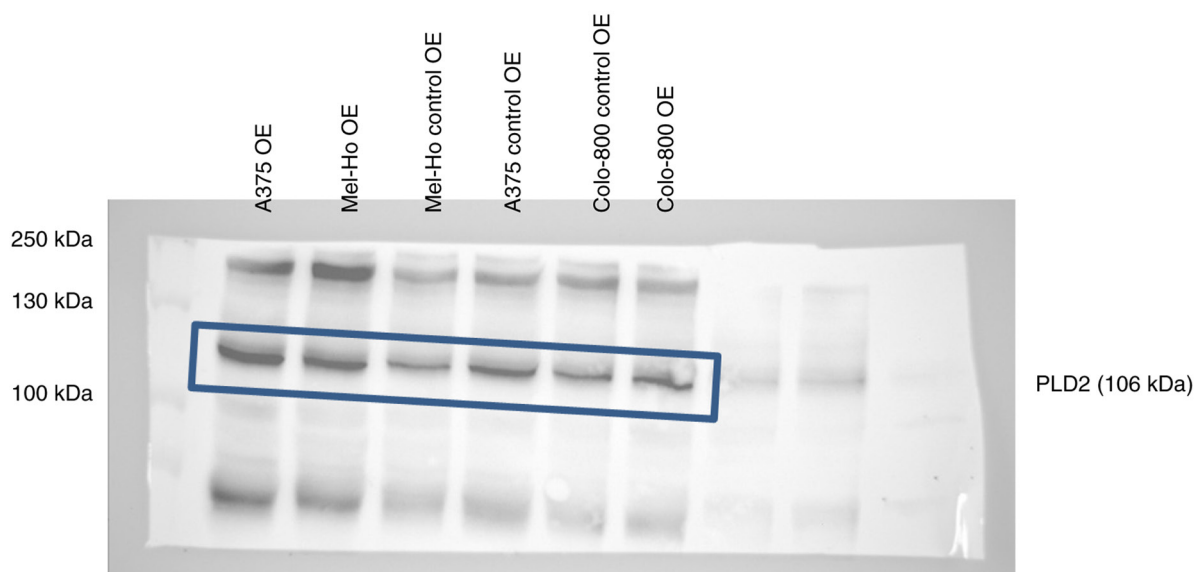

Figure S5. Cell migration of PLD2-overexpressing and -silenced melanoma cells. Representative images of the Boyden chambers of A375, Mel-Ho and Colo-800 cell lines; migration after PLD2 overexpression and silencing (original magnification, x20). PLD, phospholipase D.

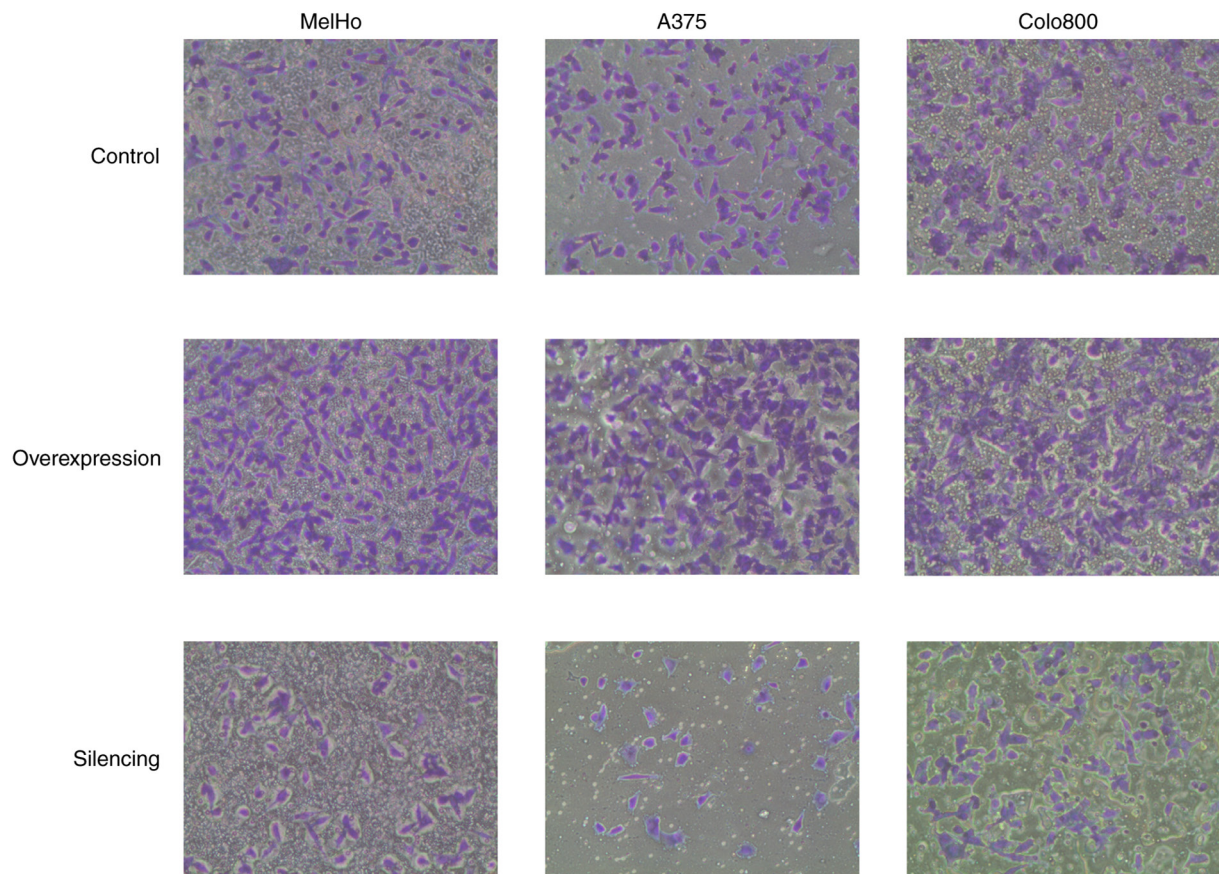

Figure S6. Cell invasion of PLD2-overexpressing and -silenced melanoma cells. Representative images of A375, Mel-Ho and Colo-800 cell lines; invasion after PLD2 overexpression and silencing (original magnification, x20). PLD, phospholipase D.

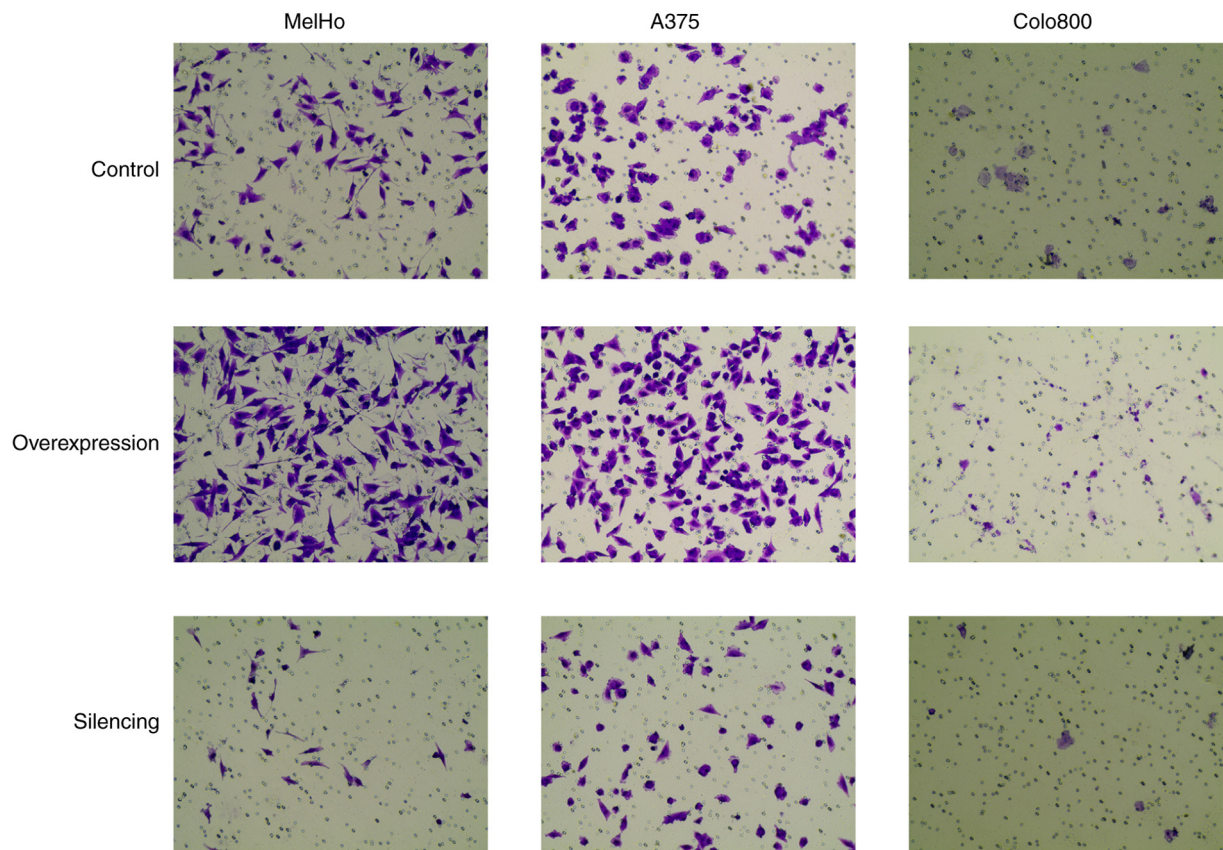

Figure S7. Comparative analysis of overall survival between patients with melanoma with high and low PLD2 expression. The analysis was performed with the skin cutaneous melanoma patient cohort from The Cancer Genome Atlas PanCancer panel, available at the cBioPortal web page (<https://www.cbioportal.org/>). mRNA expression z-scores relative to all samples (log RNA Seq V2 RSEM) for the PLD2 gene (443 samples) were collected. Among them, expression data with a z-score >1.0 were chosen as high PLD2 and those with a z-score <-1.0 as low PLD2. The survival distributions of both groups of samples were compared using the cBioPortal platform (log-rank test). The percentage of samples falling within the chosen ranges was 25.7% (114 patients). PLD, phospholipase D.

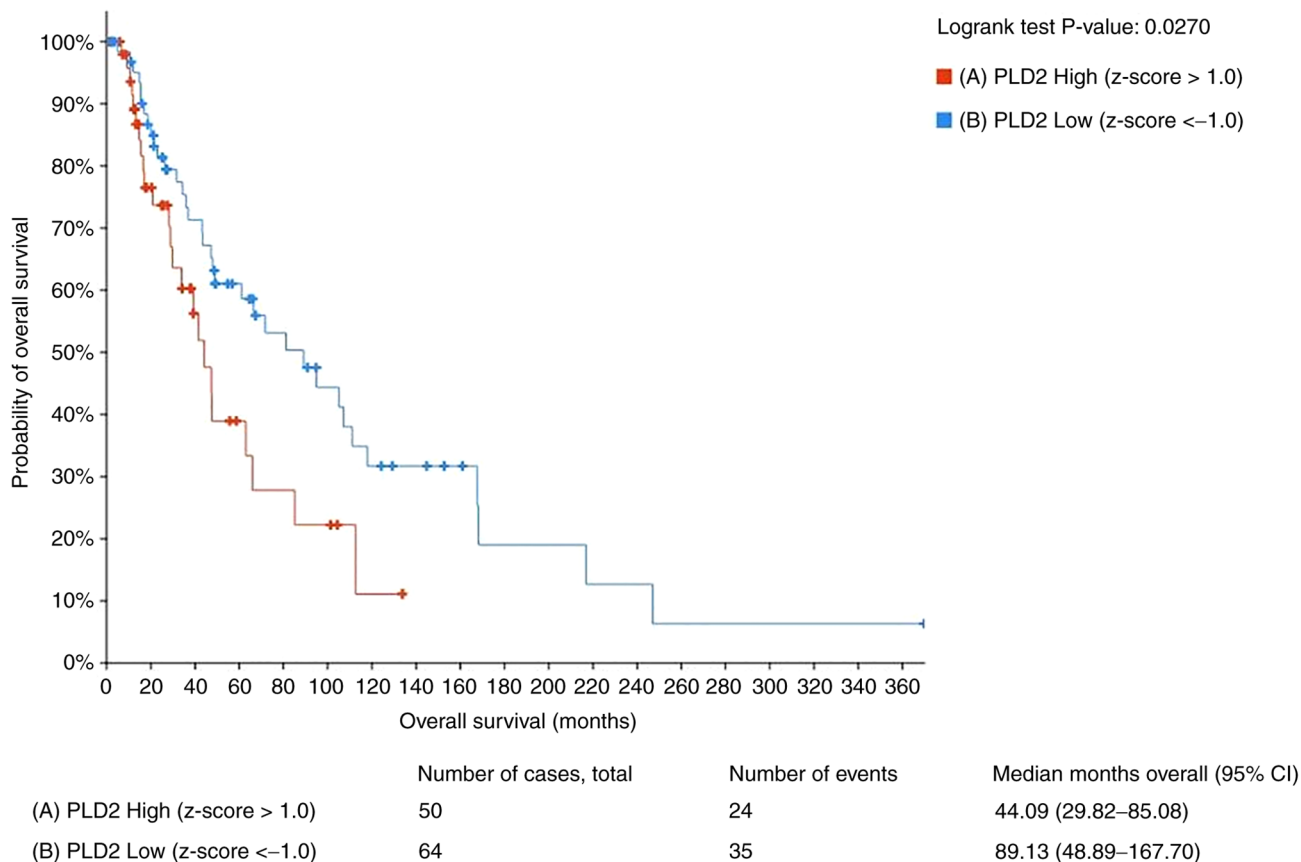

Supplement: Supplementary file 1 [file downloadSupplementary]
